# Supplementary material for: Morphological control for high proton conduction in robust Co3O4-diethylmethylamine (metal–organic framework) membrane
Source: Royal Society of Chemistry journal article supplement (doi:10.1039/d3cp02970k), 2023-01-01
Supplement: d3cp02970k1.pdf [file d3cp02970k1.pdf]

# Morphological control for high proton conduction in robust $\text{Co}_3\text{O}_4$ -diethylmethylamine (metal-organic framework) membrane

Gargi Yadav<sup>1</sup>, Pardeep K. Jha<sup>1</sup>, Priyanka A. Jha<sup>1\*</sup>, Parvin K. Singh<sup>2</sup>, Suman Roy Choudhary<sup>2</sup>,  
and Prabhakar Singh<sup>1\*</sup>

<sup>1</sup>Department of Physics, Indian Institute of Technology (Banaras Hindu University) Varanasi,  
Varanasi-221005 (India)

<sup>2</sup>Naval Materials Research Laboratory, MIDC, Shil-Badlapur Road, Addl. Ambernath, Thane,  
Maharashtra-421501(India)\*

E-mail: [priyankajha.dce@gmail.com](mailto:priyankajha.dce@gmail.com), [psingh.app@iitbhu.ac.in](mailto:psingh.app@iitbhu.ac.in)

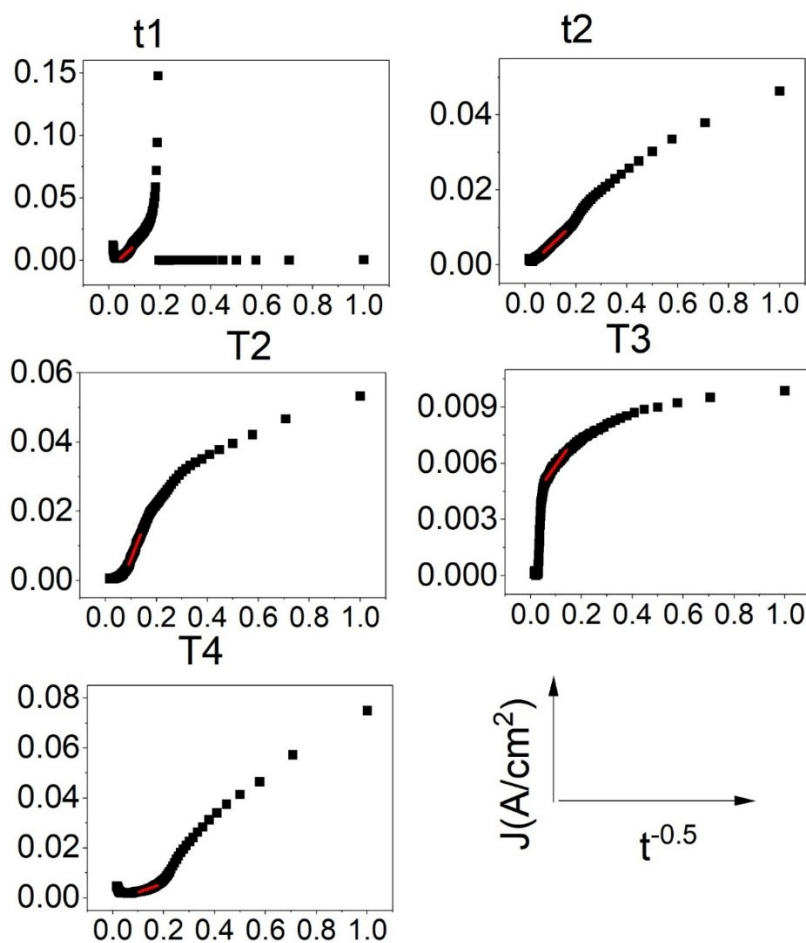

Fig. S1 Shoup-Szabo fitting for all the samples

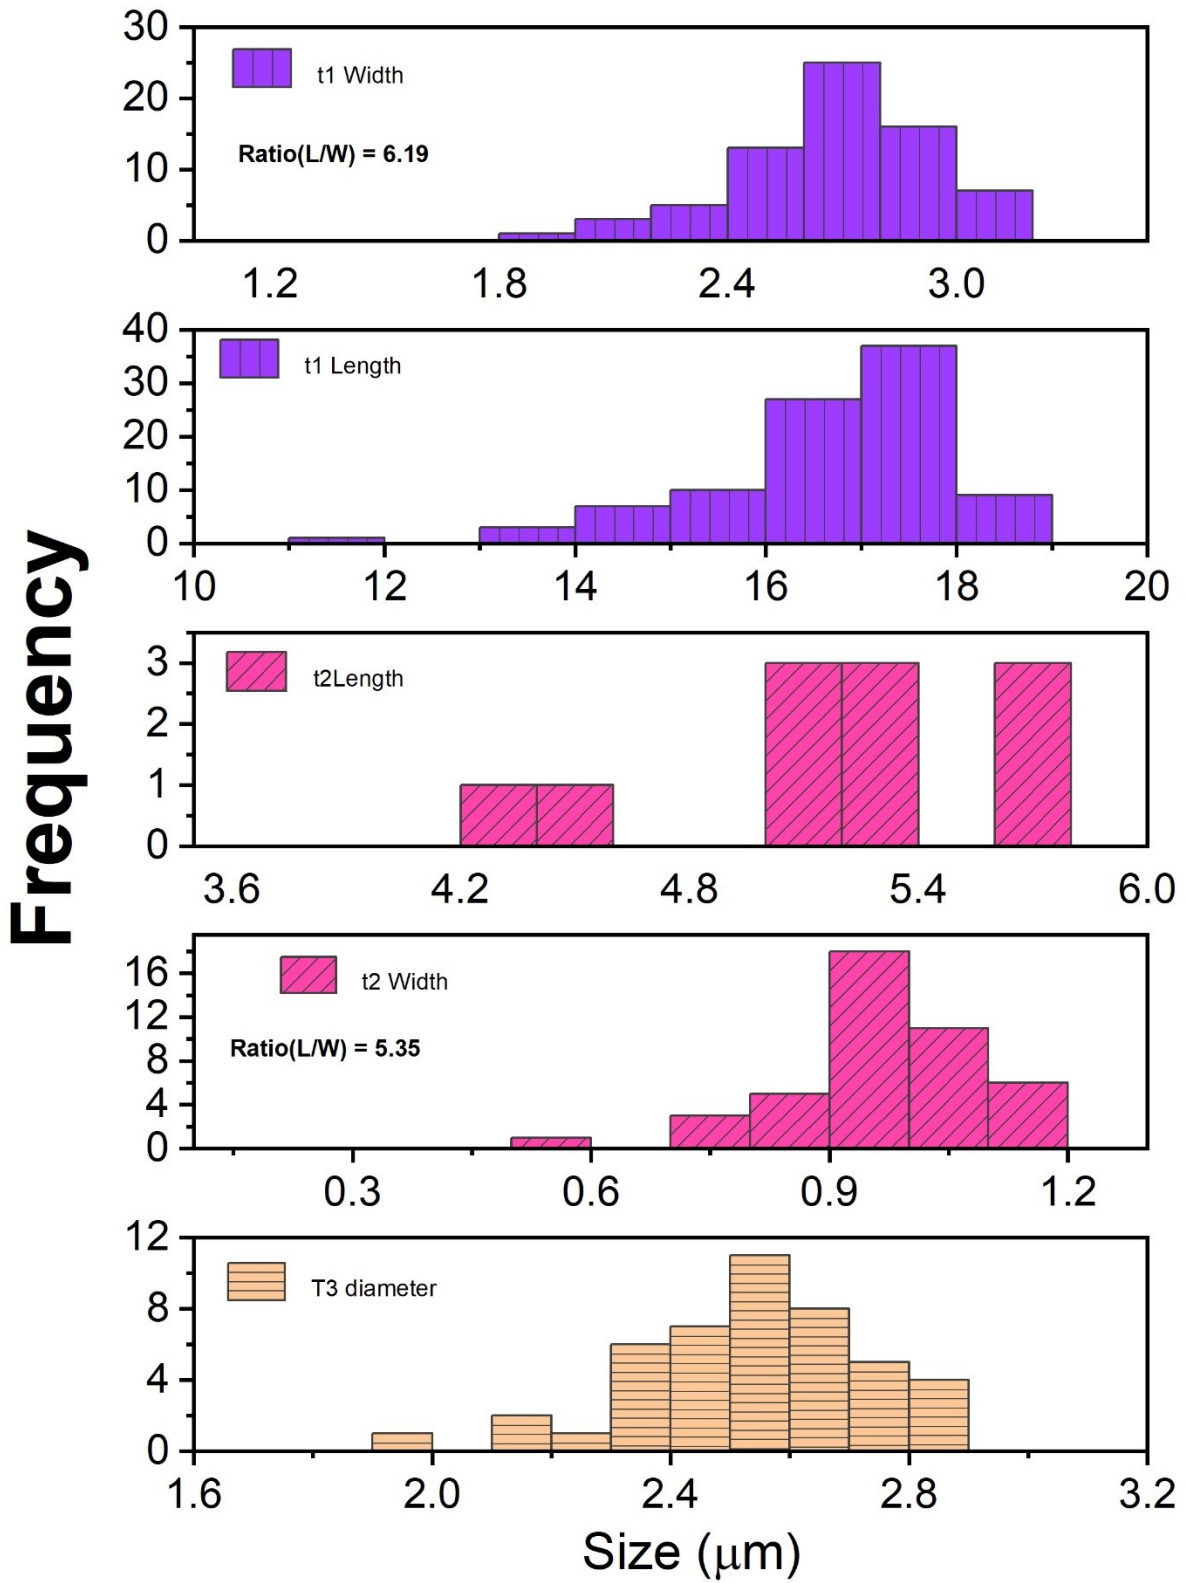

Figure S2 Grain size histograms for all the samples

Table S1 Wyckoff positions of CP glass with  $P3_121$  symmetry

| Atom | Ox. | Wyck. | Site | S.O.F. | x/a      | y/b      | z/c     | U [ $\text{\AA}^2$ ] |
|------|-----|-------|------|--------|----------|----------|---------|----------------------|
| Co1  |     | 6c    | 1    |        | 0.11837  | 0.02439  | 0.78276 | 0.0961               |
| N2   |     | 6c    | 1    |        | 0.06590  | 0.28460  | 0.30060 | 0.0961               |
| C3   |     | 6c    | 1    |        | -0.00030 | 0.22590  | 0.24610 | 0.0961               |
| N4   |     | 6c    | 1    |        | -0.16200 | 0.11010  | 0.27710 | 0.0961               |
| C5   |     | 6c    | 1    |        | 0.04520  | 0.09450  | 0.36200 | 0.0961               |
| C6   |     | 6c    | 1    |        | 0.09440  | 0.19560  | 0.37500 | 0.0961               |
| N7   |     | 6c    | 1    |        | 0.22770  | 0.04810  | 0.64010 | 0.0961               |
| C8   |     | 6c    | 1    |        | 0.25220  | -0.00980 | 0.53320 | 0.0961               |
| N9   |     | 6c    | 1    |        | 0.32190  | 0.03370  | 0.47030 | 0.0961               |
| C10  |     | 6c    | 1    |        | 0.33960  | 0.13520  | 0.54380 | 0.0961               |
| C11  |     | 6c    | 1    |        | 0.28350  | 0.14200  | 0.64400 | 0.0961               |
| H31  |     | 6c    | 1    |        | -0.03620 | 0.26600  | 0.18080 | 0.0961               |
| H51  |     | 6c    | 1    |        | 0.05590  | 0.01830  | 0.40060 | 0.0961               |
| H61  |     | 6c    | 1    |        | 0.14140  | 0.20680  | 0.44010 | 0.0961               |
| H81  |     | 6c    | 1    |        | 0.22570  | -0.08600 | 0.51060 | 0.0961               |

|      |    |   |         |         |         |        |
|------|----|---|---------|---------|---------|--------|
| H101 | 6c | 1 | 0.38640 | 0.19030 | 0.52090 | 0.0961 |
| H111 | 6c | 1 | 0.27900 | 0.27080 | 0.70320 | 0.0961 |

Table S2 Bond lengths and bond angles of CP glass with P3<sub>1</sub>21 symmetry

|      | ( Atom 1 | atom 2     | d12  | atom 3     | d13         | angle 213) |
|------|----------|------------|------|------------|-------------|------------|
| C3   | Co1      | 2.0111(7)  | N4   | 2.2821(7)  | 113.827(15) |            |
| C5   | C6       | 1.2240(4)  | N7   | 1.5923(5)  | 43.253(7)   |            |
|      | C6       | 1.2240(4)  | C11  | 1.9947(6)  | 38.642(6)   |            |
|      | C6       | 1.2240(4)  | H51  | 2.0874(10) | 83.539(16)  |            |
|      | N7       | 1.5923(5)  | C11  | 1.9947(6)  | 29.904(5)   |            |
|      | N7       | 1.5923(5)  | H51  | 2.0874(10) | 121.629(10) |            |
|      | C11      | 1.9947(6)  | H51  | 2.0874(10) | 119.965(8)  |            |
| C6   | N7       | 1.0930(3)  | C5   | 1.2240(4)  | 86.627(14)  |            |
|      | N7       | 1.0930(3)  | C11  | 1.2896(5)  | 48.985(13)  |            |
|      | N7       | 1.0930(3)  | H51  | 2.2979(7)  | 140.998(14) |            |
|      | C5       | 1.2240(4)  | C11  | 1.2896(5)  | 105.009(10) |            |
|      | C5       | 1.2240(4)  | H51  | 2.2979(7)  | 64.503(8)   |            |
|      | C11      | 1.2896(5)  | H51  | 2.2979(7)  | 159.513(11) |            |
| N7   | C11      | 1.0038(3)  | C6   | 1.0930(3)  | 75.773(17)  |            |
|      | H81      | 1.3456(6)  | H101 | 2.2091(6)  | 109.158(8)  |            |
|      | H81      | 1.3456(6)  | H61  | 2.4978(7)  | 147.309(12) |            |
|      | C10      | 1.6064(5)  | H101 | 2.2091(6)  | 33.958(5)   |            |
|      | C10      | 1.6064(5)  | H61  | 2.4978(7)  | 46.326(6)   |            |
|      | H101     | 2.2091(6)  | H61  | 2.4978(7)  | 69.251(8)   |            |
| C10  | H101     | 1.2545(6)  | C8   | 1.6064(5)  | 100.378(10) |            |
|      | H101     | 1.2545(6)  | H61  | 1.8105(5)  | 121.27(2)   |            |
|      | C8       | 1.6064(5)  | H61  | 1.8105(5)  | 93.753(10)  |            |
| C11  | N7       | 1.0038(3)  | C6   | 1.2896(5)  | 55.242(16)  |            |
|      | N7       | 1.0038(3)  | C5   | 1.9947(6)  | 52.263(10)  |            |
|      | C6       | 1.2896(5)  | C5   | 1.9947(6)  | 36.350(9)   |            |
| H51  | C5       | 2.0874(10) | C6   | 2.2979(7)  | 31.958(6)   |            |
| H61  | C10      | 1.8105(5)  | C8   | 2.4978(7)  | 39.921(7)   |            |
| H81  | C8       | 1.3456(6)  | N9   | 2.3316(10) | 111.127(43) |            |
| H101 | C10      | 1.2545(6)  | C8   | 2.2091(6)  | 45.664(8)   |            |

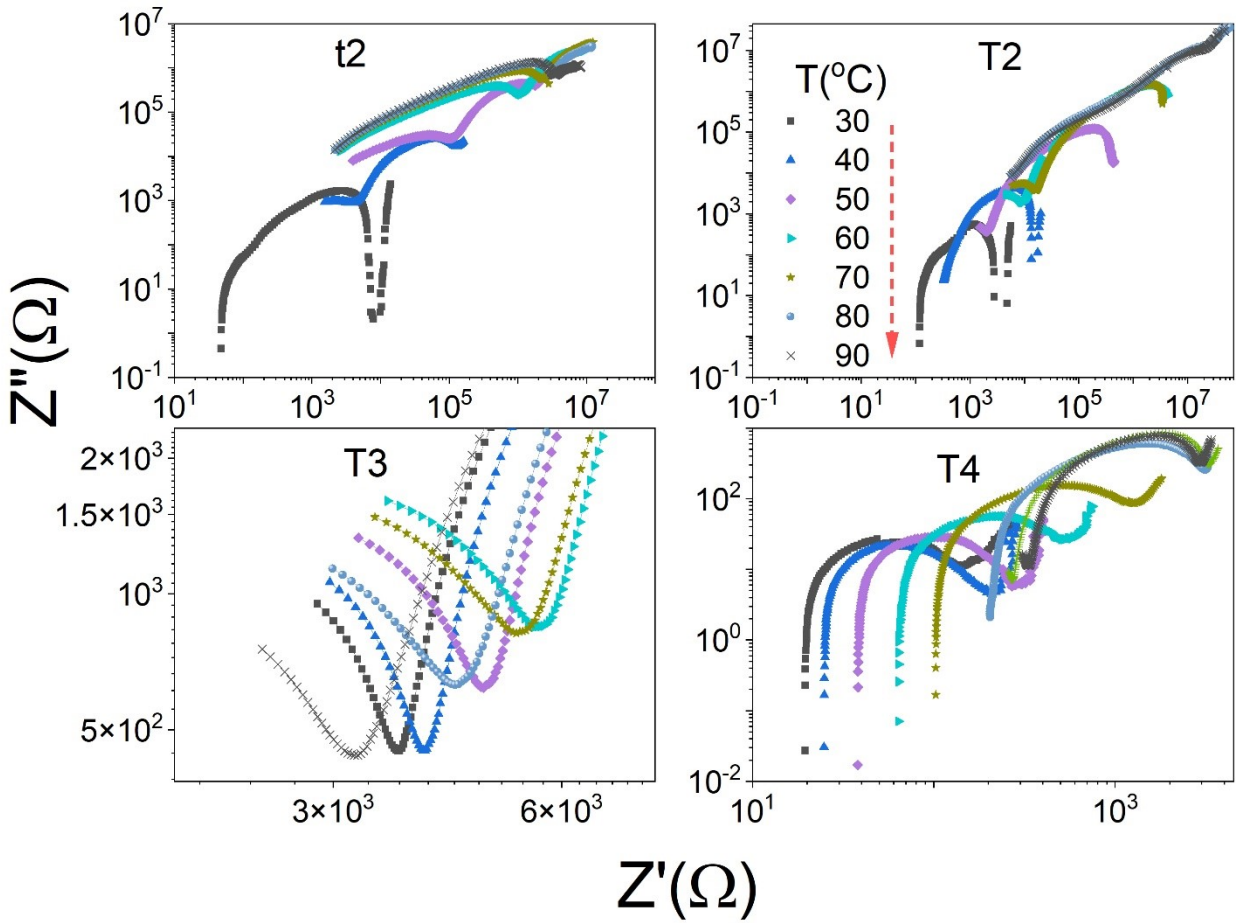

Figure S3 Impedance Nyquist plots in log-log representation with the variation of duration and temperature

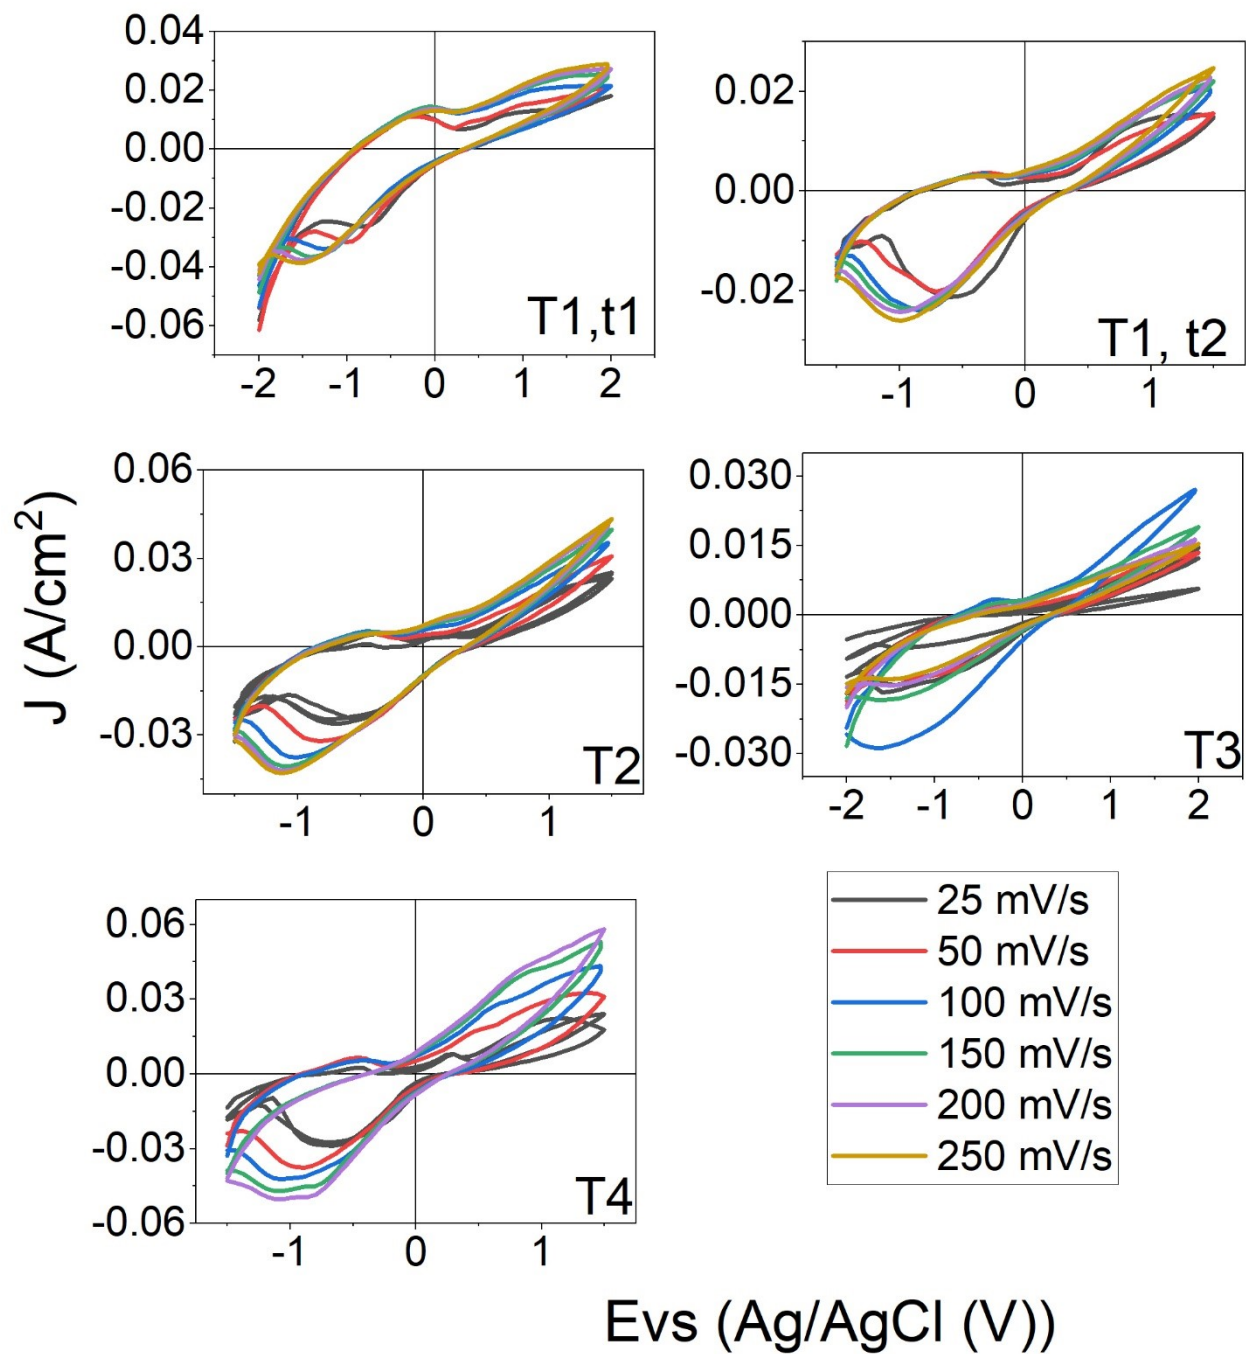

Figure S4 Cyclic voltammograms with the variation of scan rate for all the samples

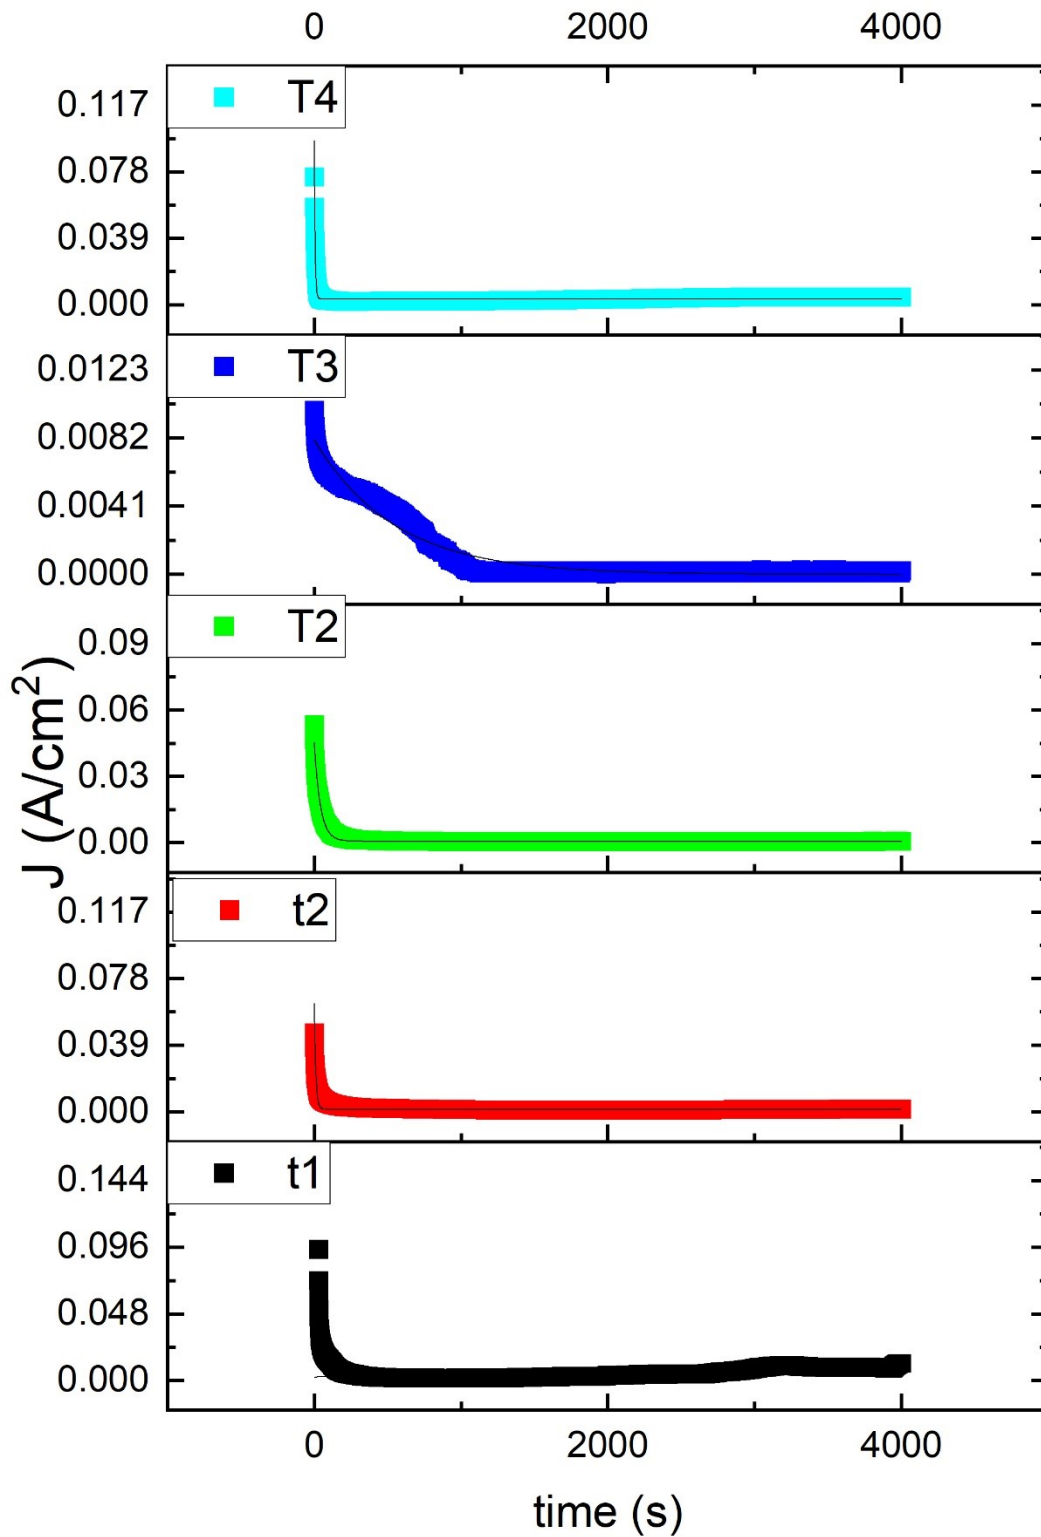

Fig. S5 Chronoamperometric curve of current density and time for all the samples

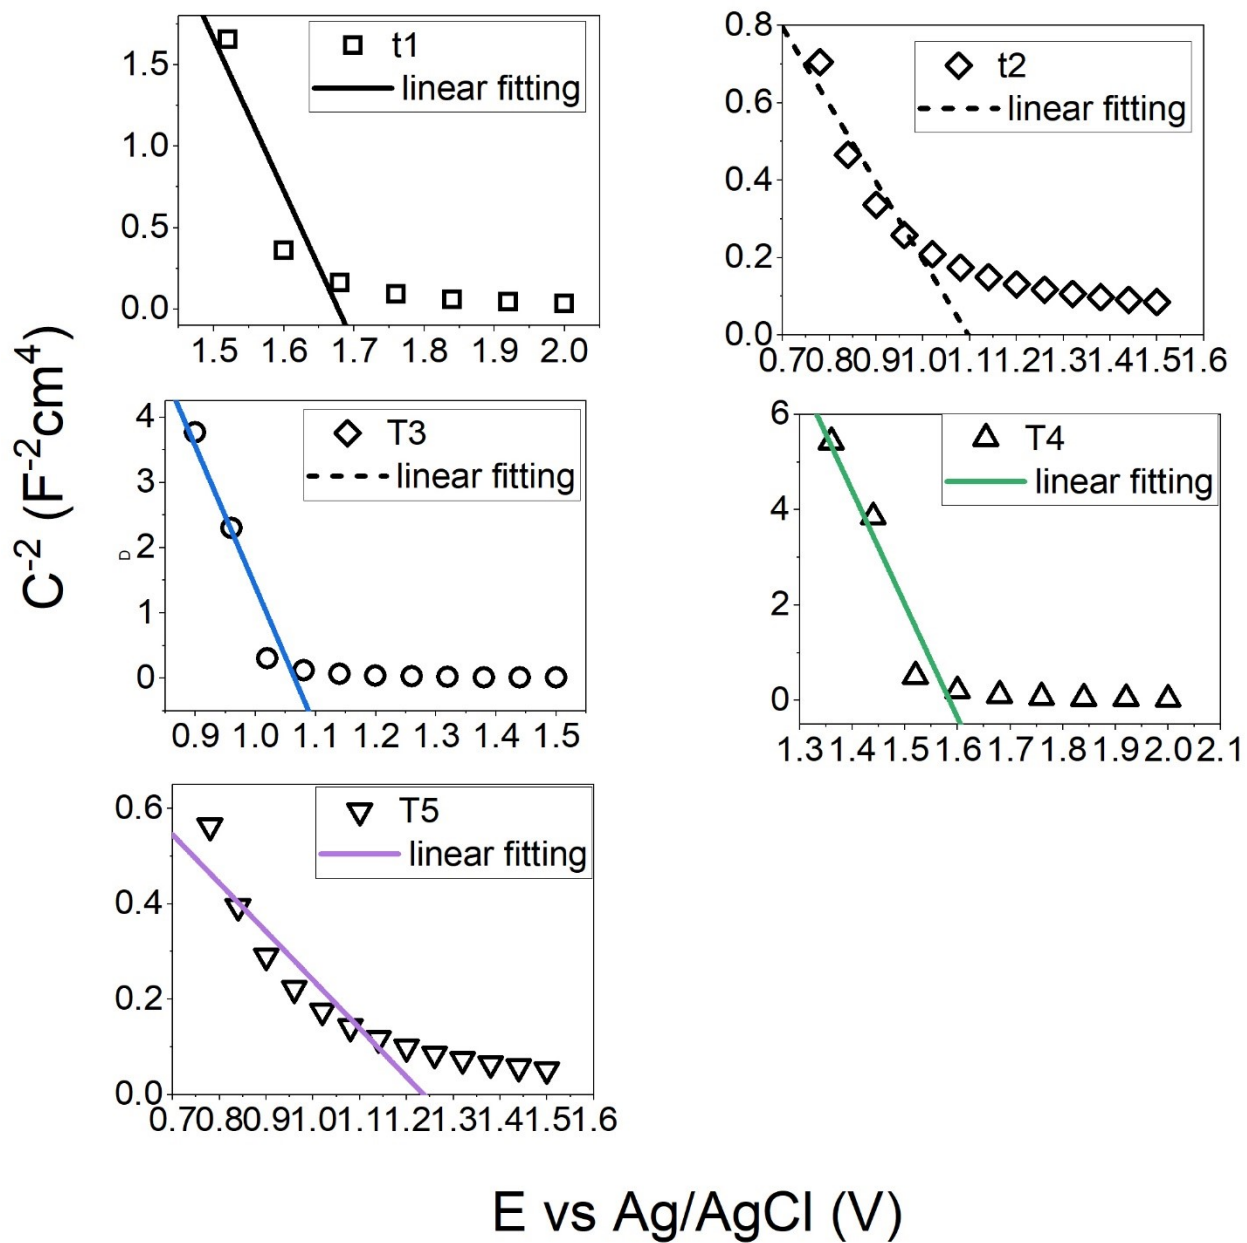

Fig. S6 Mott Schottky plots for all the membranes suggesting p-type semiconductor nature



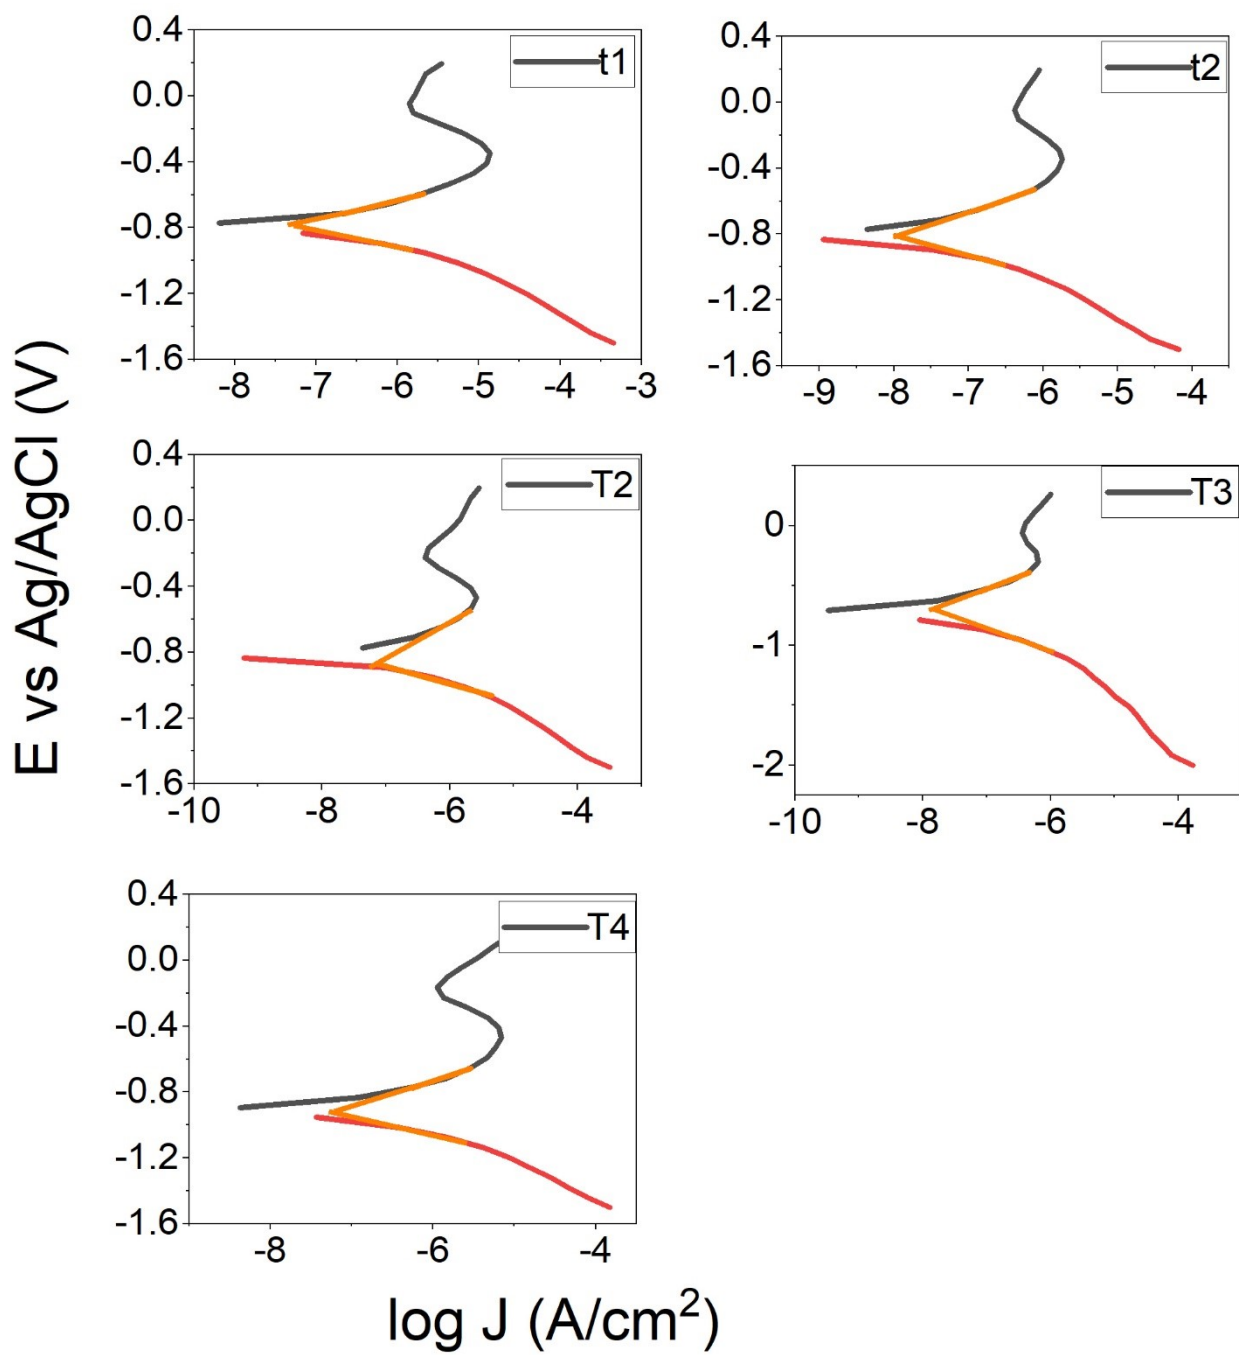

Fig. S7 Variation of  $\log J$  vs  $E$  for all the films
